# Supplementary material
Source: publisher figshare collection journal article supplement (https://f1000.figshare.com/ndownloader/files/1418603)
Supplement: Supplementary file 1 [file 1418603]

	Control	Induced	Induced plus chitosan
Liver	0	280000000	35000000
	0	59550000	31500000
	0	108000000	23500000
	0	27400000	12400000
	0	235900000	0
Kidney	0	114000000	5300000
	0	0	0
	0	0	0
	0	0	0
	0	4897000	0
Intestine	0	535700000	66000000
	0	147000000	237000000
	0	320000000	30360000
	18500000	892700000	775600000
	102700000	119500000	0
